# Supplementary material
Source: PubMed Central journal article supplement (PMC8935213)
Supplement: develop-149-200013-s1.pdf [file develop-149-200013-s1.pdf]

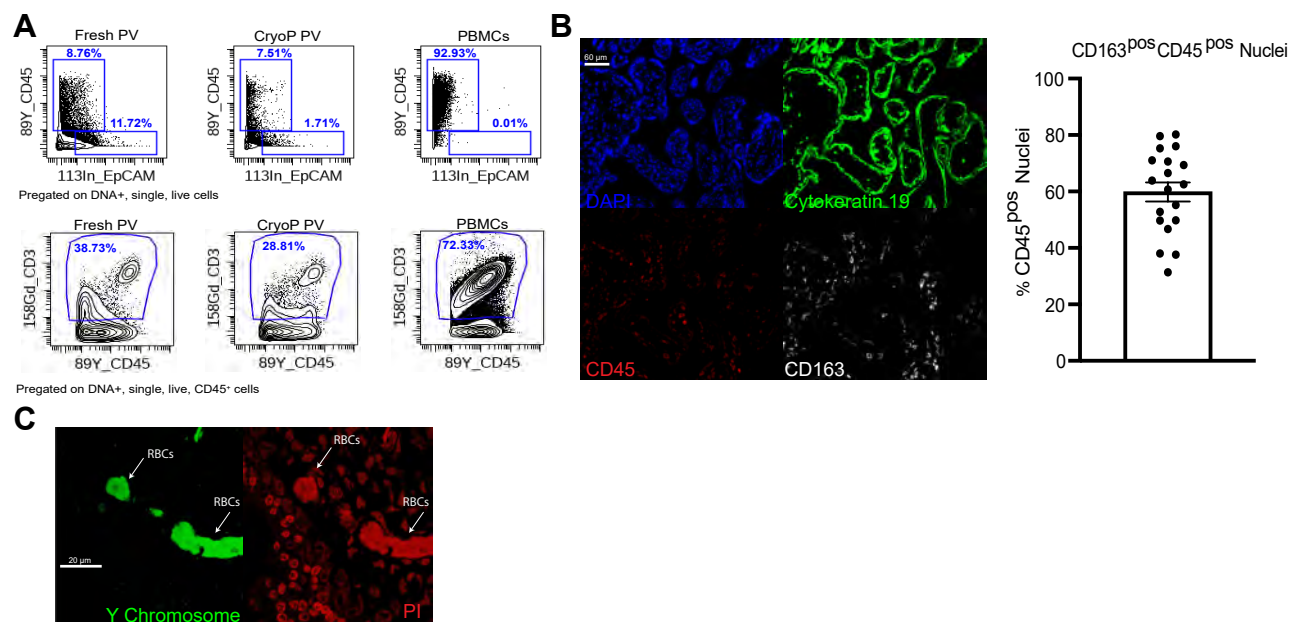

**Fig. S1.** (A) Comparison of CyTOF analysis of CD45<sup>pos</sup> and T cell abundances between fresh PV, cryopreserved PV and frozen Peripheral Blood Mononuclear Cells (PBMCs). CyTOF analysis (n=12), see Table S5 for omitted cases. (B) Splits of immunofluorescence for intravillous immune cell detection and quantification of CD163<sup>hi</sup> immune cells (n=19). (C) Splits for Y-chromosome *in situ* hybridization. All graphs are represented as Mean +/-SE (standard error).

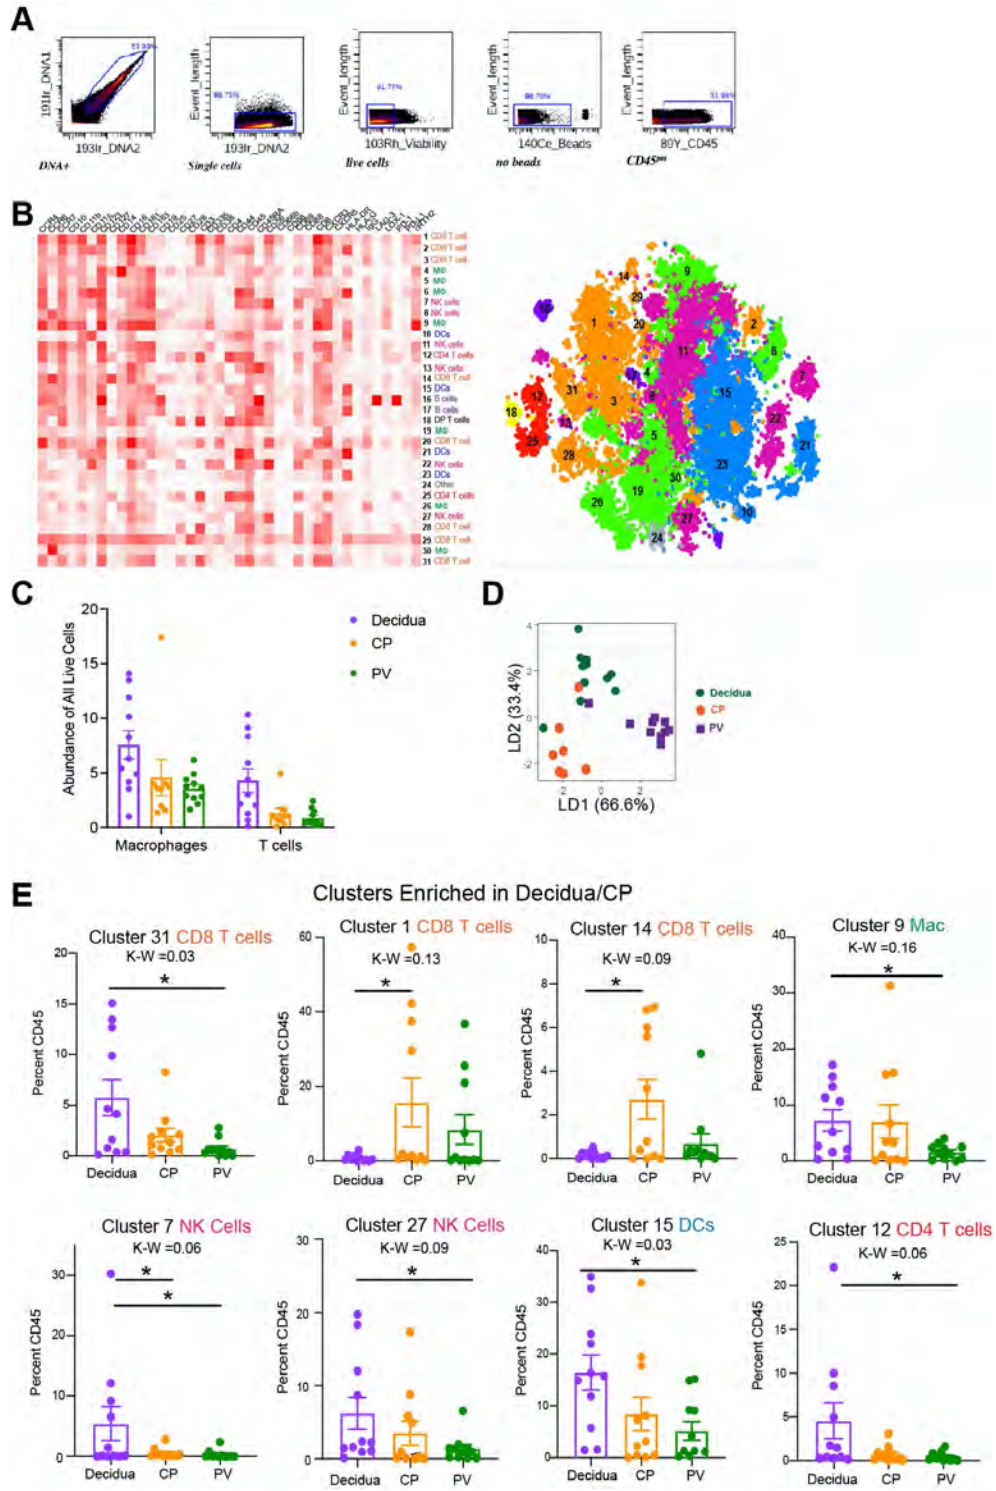



**Fig. S2.** (A) Pre-gating strategy for CD45<sup>pos</sup> population used in automated clustering. (B) Clustergram heatmap used for cluster identification (left) of tsne clusters mapped (right). (C) Abundance of major immune subsets as a proportion of all live cells. (D) Linkage Disequilibrium (LD) plot confirming segregation of placental layer immune profile. (E) Abundance of decidua and CP enriched clusters. CyTOF analysis starting (n=12), see Table S5 for omitted cases. \* = p value < 0.05 after posthoc analysis from Kruskal-Wallis (K-W) test. All graphs are represented as Mean +/-SE (standard error).

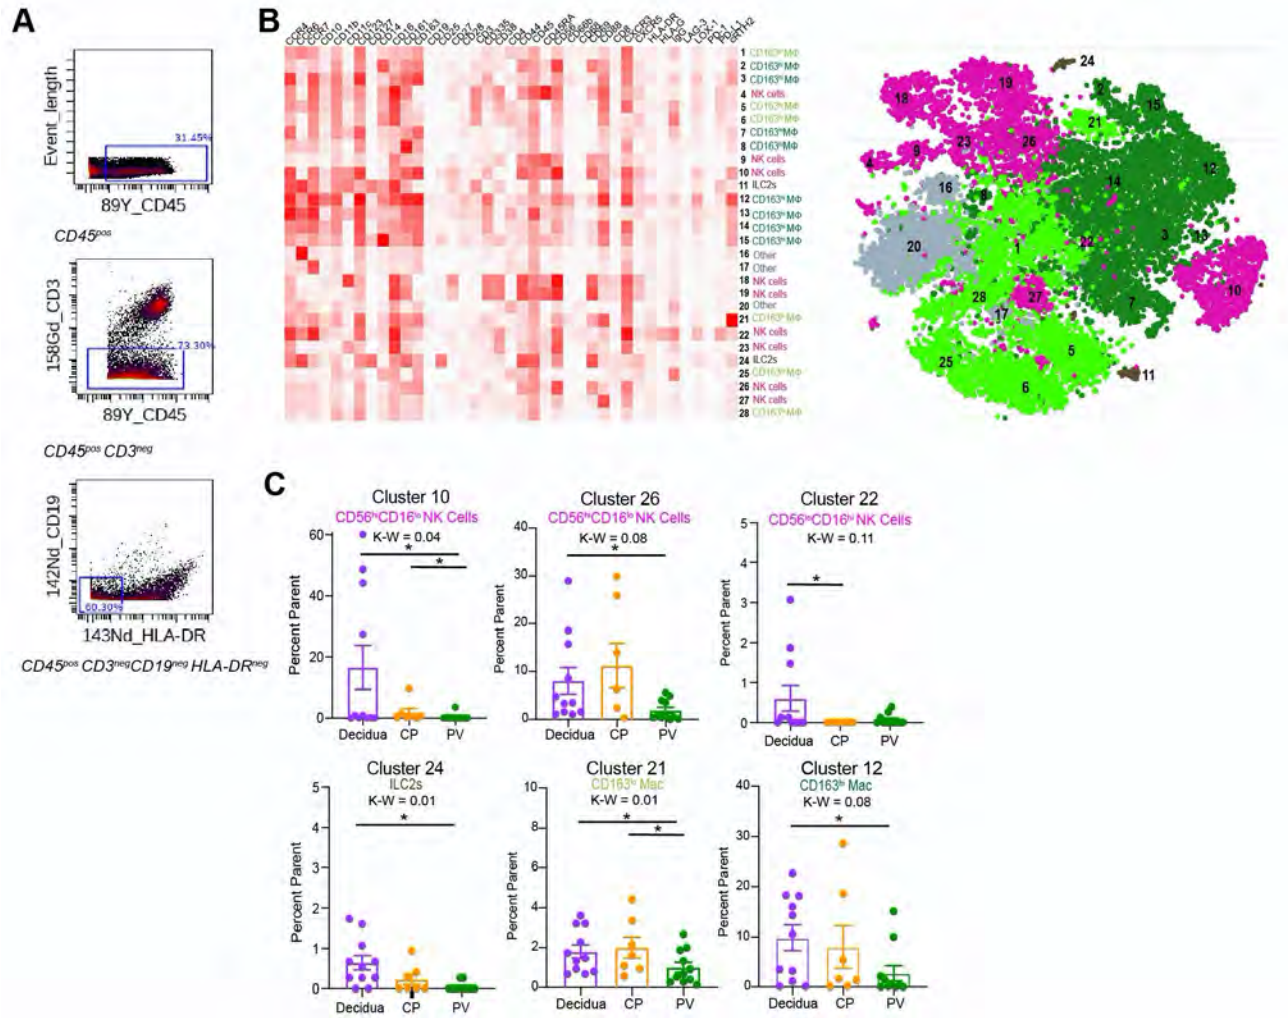

**Fig. S3.** (A) Pregating strategy for innate non-APC population. (B) Clustergrammap heatmap used for cluster identification (left) of tsn clusters mapped (right). (C) Cumulative data on abundance of decidua and CP enriched clusters. CyTOF analysis starting (n=12), see Table S5 for omitted cases. \* = p value < 0.05 after posthoc analysis from Kruskal-Wallis (K-W) test. All graphs are represented as Mean +/-SE (standard error).

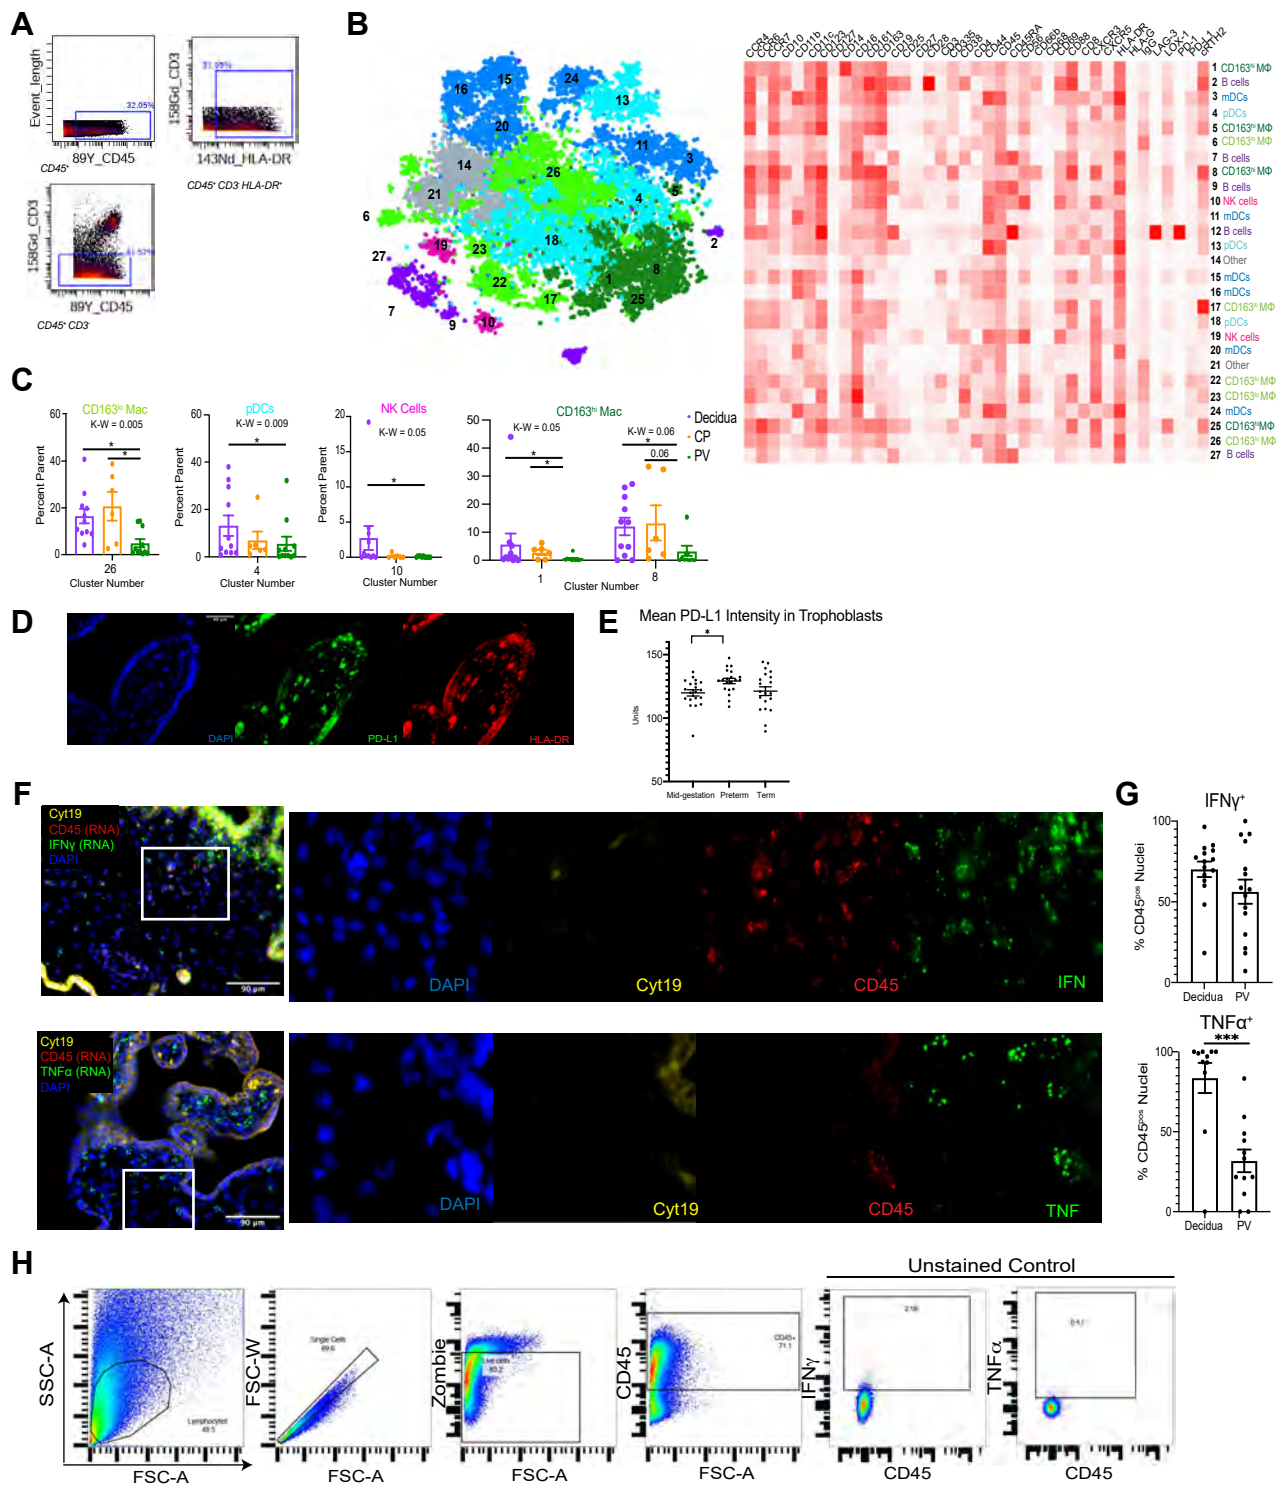

**Fig. S4.** (A) Pre-gating strategy for APC population. (B) Clustergram heatmap used for cluster identification (left) of tSNE clusters mapped (right). (C) Cumulative data on abundance of decidua and CP enriched clusters. CyTOF analysis starting (n=12), see Table S5 for omitted cases. \* = p value < 0.05 after posthoc analysis from Kruskal-Wallis (K-W) test. (D) Splits for PD-L1<sup>pos</sup> PV APCs representative image. (E) Quantification of trophoblast expression of PD-L1

via IHC. (n=2) (F) Splits for dual RNA *in situ* hybridization and IF. Representative images in main figure taken from region identified in white rectangle. (G) Quantification of staining for cytokine positive immune cells in PV and decidua. (n=4) (H) Pregating for CD45<sup>pos</sup> population with flow cytometry. \*\*\* = p-value < 0.001 in Mann-Whitney two tailed test. All graphs are represented as Mean +/-SE (standard error).



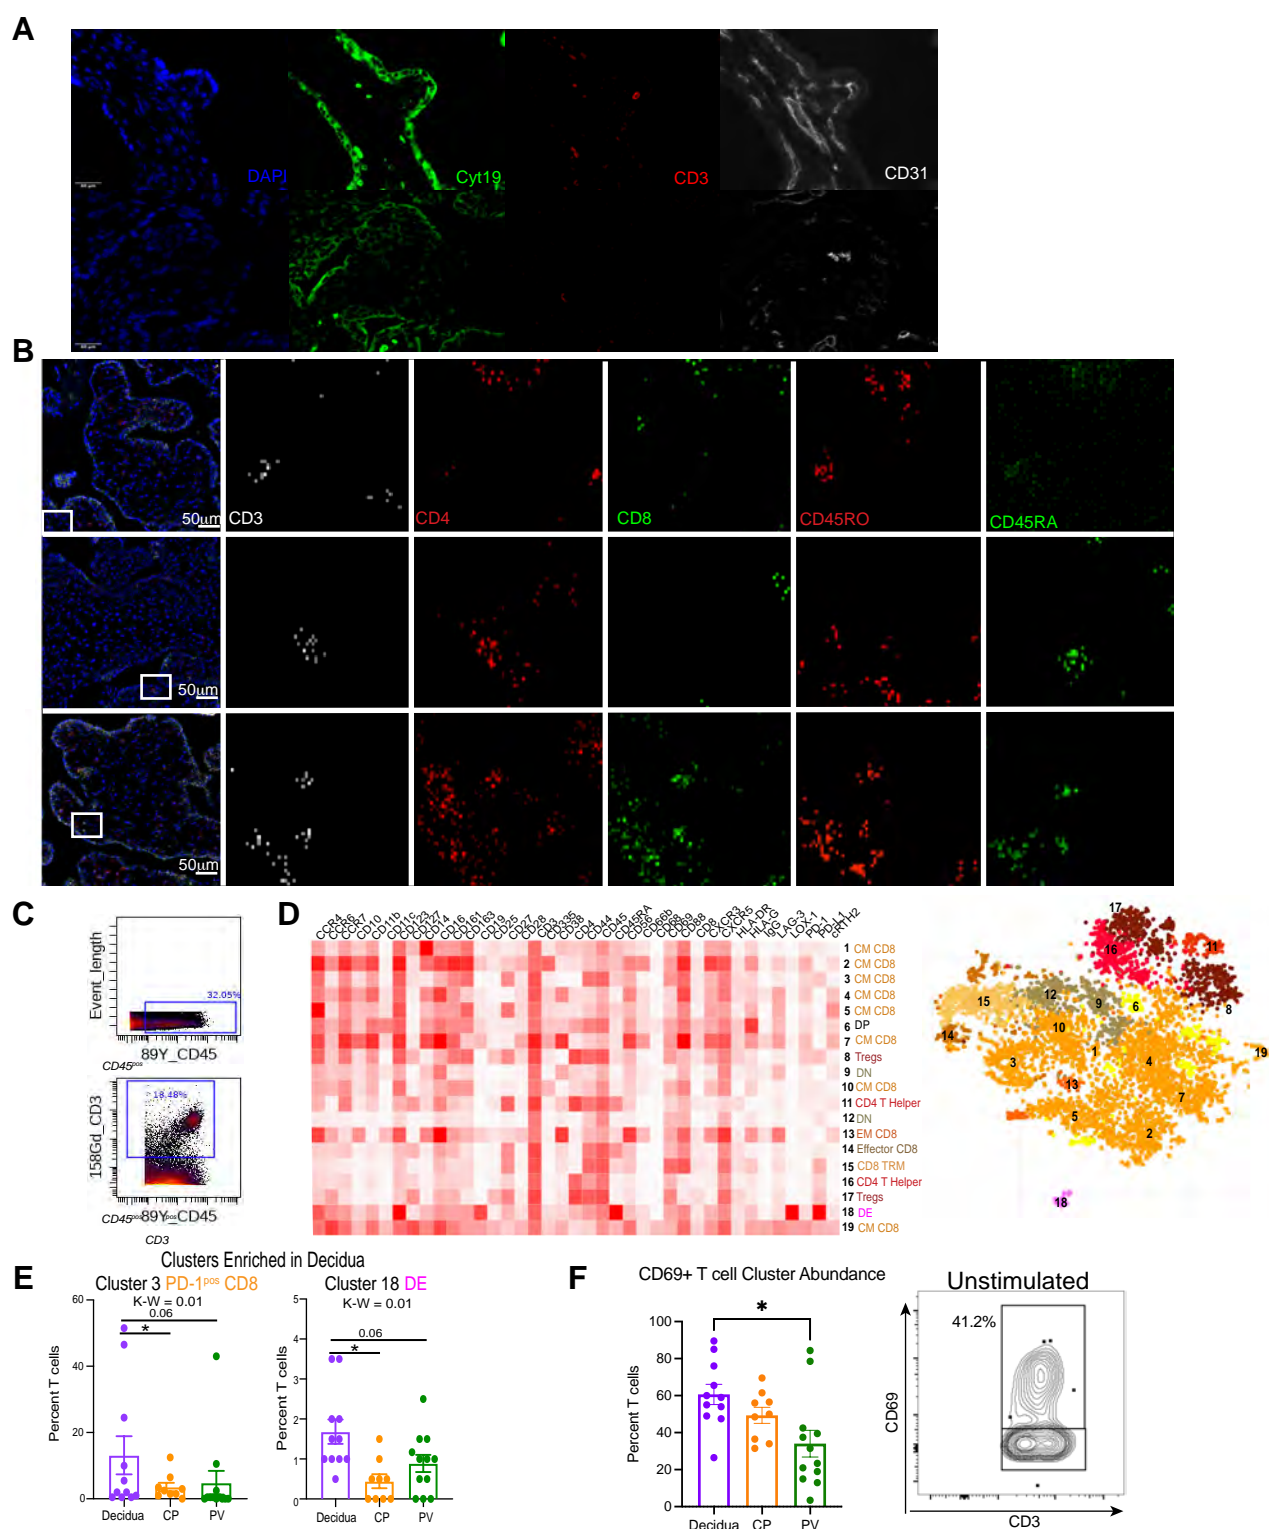

**Fig. S5.** (A) Splits from IF detection of T cells and PV endothelium. (B) Splits from representative IMC images of T cell subsets. T cells show in main figures identified in regions highlighted with white rectangles. (C) Pregating strategy for T cell population. (D) Clustergrammer heatmap used for cluster identification (left) of tSNE clusters mapped (right). (E)

Cumulative data on abundance of decidua and CP enriched clusters. \* = p value < 0.05 after posthoc analysis from Kruskal-Wallis (K-W) test. (F) Abundance of CD69+ T cells calculated by summation of all CD69+ T cell tsne clusters (left) see Table S5 for omitted cases. Representative FACS plot of CD69+ T cells isolated from mid-gestation placenta (right). All graphs are represented as Mean +/-SE (standard error).

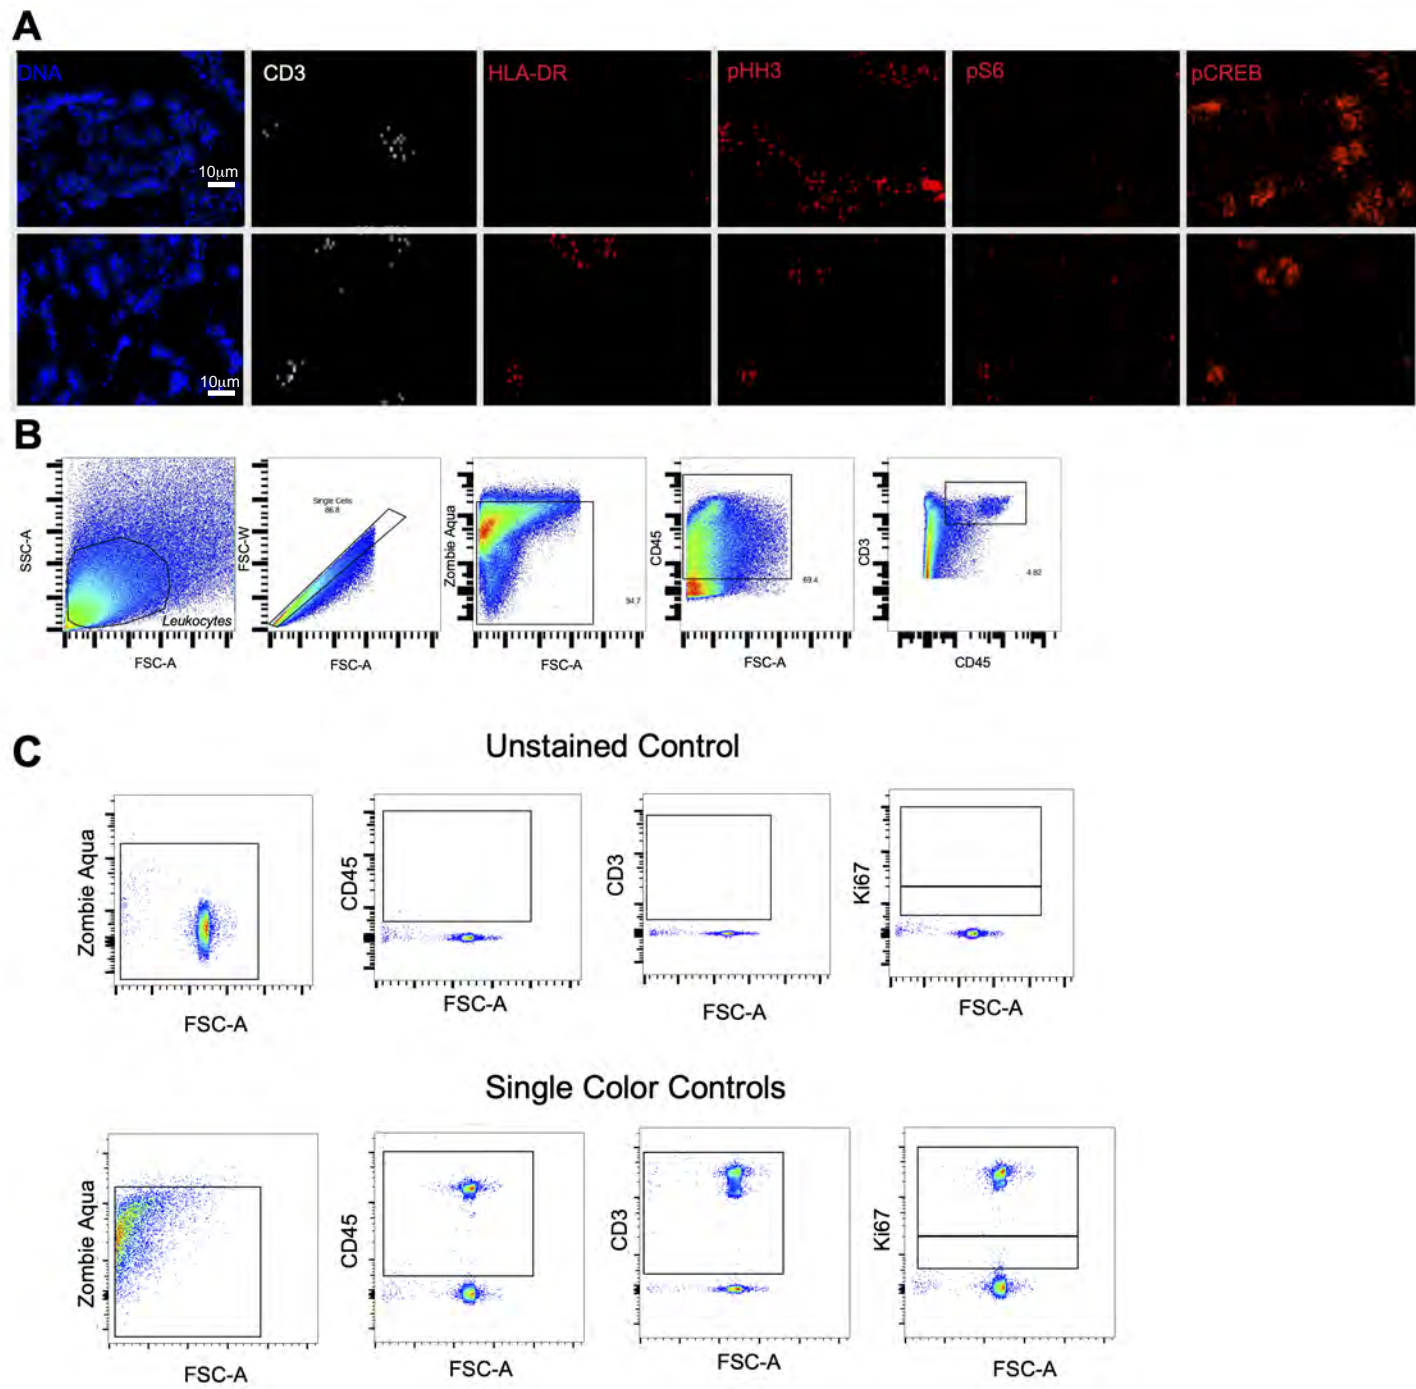

**Fig. S6.** (A) Splits from IMC images showing inactive and active T cells in PV. (B) Pregating strategy for CD69<sup>pos</sup> and CFSE<sup>pos</sup> T cells. (C) Gating for proliferative populations quantified in main text. All experiments are (n=3).

Table S1. Patient Cohort

| Demographic Information |                 |     |                    |            |                    |       | Experimental Use |      |      |       |     |      |     |               |              |
|-------------------------|-----------------|-----|--------------------|------------|--------------------|-------|------------------|------|------|-------|-----|------|-----|---------------|--------------|
| Sample Number           | Gestational Age | Sex | Maternal Age Range | Diagnosis  | Method of Delivery | Labor | RNAseq           | qPCR | FISH | CyTOF | IMC | RISH | IHC | TCR Stim CFSE | TCR Stim K67 |
| 1130                    | 23 weeks        | F   | 25-30              | ET         | N/A                | N/A   | ✓                |      |      | ✓     |     | ✓    | ✓   |               |              |
| 1143                    | 23 weeks        | M   | 20-25              | ET         | N/A                | N/A   | ✓                |      |      | ✓     |     |      |     |               |              |
| 1146                    | 23 weeks        | F   | 25-30              | ET         | N/A                | N/A   | ✓                |      |      | ✓     |     |      |     |               |              |
| 1081                    | 22 weeks        | M   | 25-30              | ET         | N/A                | N/A   |                  |      |      |       |     |      |     |               |              |
| 1131                    | 18 weeks        | M   | 20-25              | ET         | N/A                | N/A   |                  | ✓    |      |       |     |      |     |               |              |
| 1132                    | 22 weeks        | M   | 30-35              | ET         | N/A                | N/A   |                  | ✓    |      | ✓     |     |      |     |               |              |
| 1186                    | 18-19 weeks     | M   | 30-35              | ET         | N/A                | N/A   |                  | ✓    |      |       | ✓   |      |     | ✓             |              |
| 1100A                   | 21 weeks        | N/A | 34-40              | ET         | N/A                | N/A   |                  | ✓    |      |       |     |      | ✓   |               |              |
| 1102                    | 21 weeks        | F   | 40-45              | ET         | N/A                | N/A   |                  | ✓    |      | ✓     |     |      |     |               |              |
| 1055                    | 23 weeks        | F   | 35-40              | ET         | N/A                | N/A   |                  | ✓    |      | ✓     |     |      |     |               |              |
| 1108                    | 22 weeks        | F   | 25-30              | ET         | N/A                | N/A   |                  |      |      |       |     | ✓    |     |               |              |
| 1038                    | 21 weeks        | M   | N/A                | ET         | N/A                | N/A   |                  |      | ✓    | ✓     |     |      |     |               |              |
| 1042                    | 22 weeks        | M   | N/A                | ET         | N/A                | N/A   |                  |      | ✓    | ✓     |     |      |     |               |              |
| 1094                    | 17 weeks        | F   | 25-30              | ET         | N/A                | N/A   |                  |      | ✓    | ✓     |     |      |     | ✓             |              |
| 1106                    | 21 weeks        | F   | 30-35              | ET         | N/A                | N/A   |                  |      | ✓    | ✓     |     | ✓    |     |               |              |
| 1185                    | 18 weeks        | M   | 20-25              | ET         | N/A                | N/A   |                  |      | ✓    | ✓     | ✓   | ✓    |     | ✓             |              |
| PO38                    | 23 weeks        | F   | N/A                | ET         | N/A                | N/A   |                  |      | ✓    | ✓     |     |      |     |               |              |
| 1304                    | 39 weeks        | M   | N/A                | HT         | C-section          | N     |                  |      |      |       |     |      |     |               | ✓            |
| 1315                    | 37 weeks        | F   | N/A                | HT         | C-section          | N     |                  |      |      |       |     |      |     |               | ✓            |
| 1316                    | 39 weeks        | M   | N/A                | HT         | C-section          | N     |                  |      |      |       |     |      |     |               | ✓            |
| 1302                    | 39 weeks        | M   | N/A                | HT         | C-section          | N     |                  |      |      |       |     |      | ✓   |               |              |
| 1303                    | 39 weeks        | F   | N/A                | HT         | C-section          | N     |                  |      |      |       |     |      | ✓   |               |              |
| 1230                    | 29 weeks        | M   | N/A                | Hemorrhage | Vaginal            | Y     |                  |      |      |       |     |      | ✓   |               |              |
| 1236                    | 35 weeks        | M   | N/A                | D, HyT     | C-section          | N/A   |                  |      |      |       |     |      | ✓   |               |              |

\* genetic case  
 ET, Elective Termination  
 HTD, Healthy Term  
 Y, Yes  
 N, No  
 D, Diabetes  
 Hyt, Hypertension

Table S2. Differentially Expressed Genes Between Decidua, CP and PV

[Click here to download Table S2](#)



Table S3. Selected Immune Genes

| Gene Name | Expression Values |           |           |        |        |        |        |        |        |
|-----------|-------------------|-----------|-----------|--------|--------|--------|--------|--------|--------|
|           | Decidua 1         | Decidua 2 | Decidua 3 | CP1    | CP2    | CP3    | PV1    | PV2    | PV3    |
| PTPRC     | 18.25             | 9.53      | 13.57     | 6.64   | 7.22   | 0.21   | 2.84   | 2.84   | 4.34   |
| CD3D      | 5.02              | 3.87      | 5.38      | 0      | 0.64   | 0      | 0      | 0.65   | 0.47   |
| CD3G      | 0.63              | 0.3       | 0.67      | 0      | 0.39   | 0      | 0.12   | 0.12   | 0.21   |
| CD3E      | 9.3               | 4.15      | 7.35      | 0.04   | 0.53   | 0      | 0.13   | 0.17   | 1.85   |
| CD4       | 48.51             | 60.61     | 62.16     | 20.23  | 24.72  | 2.04   | 17.55  | 39.68  | 46.63  |
| CD8A      | 0.38              | 2.85      | 1.73      | 0      | 0.25   | 0      | 0      | 0.11   | 0.76   |
| IL7R      | 1.08              | 0.75      | 2.66      | 0.14   | 1.56   | 0.1    | 0.19   | 0.29   | 0.71   |
| CD19      | 0.06              | 0.05      | 0.49      | 0.79   | 0.44   | 0.03   | 0      | 0.42   | 0.27   |
| NCAM1     | 6.53              | 2.02      | 3.29      | 0.18   | 0.02   | 0.06   | 0      | 0.01   | 0.33   |
| CD14      | 444.26            | 329.06    | 470.57    | 228.26 | 219.48 | 3.83   | 162.49 | 324.13 | 430.24 |
| CD163     | 54.09             | 37.6      | 44.92     | 43.76  | 29.41  | 0.9    | 20.53  | 31.63  | 36.2   |
| CD68      | 385.84            | 213.79    | 459.9     | 78.93  | 110.38 | 9.69   | 115.92 | 62.35  | 165.92 |
| IL3RA     | 4.65              | 11.15     | 5.31      | 2.78   | 13.33  | 0.21   | 11.2   | 8.06   | 9.96   |
| ITGAX     | 11.27             | 4.97      | 18.49     | 1.46   | 3.36   | 0.06   | 0.98   | 0.75   | 1.18   |
| HLA-DRA   | 1,690.96          | 589.86    | 962.34    | 386.91 | 495.82 | 4.53   | 55.26  | 86.08  | 67.75  |
| HLA-DRB5  | 258.75            | 101.54    | 238.74    | 50.52  | 87.15  | 0.99   | 6.51   | 19.9   | 22.32  |
| HLA-DRB6  | 48.63             | 23.05     | 70.91     | 13.91  | 22.82  | 0.4    | 2.66   | 3.21   | 4.85   |
| CD69      | 8.06              | 4.16      | 17.1      | 1.93   | 2.04   | 1.32   | 1.72   | 0.48   | 3.53   |
| CD44      | 50.77             | 30.92     | 50.01     | 22.61  | 31.86  | 2      | 24.06  | 19.52  | 48.42  |
| NFKB1     | 16.11             | 34.05     | 22.71     | 7.99   | 30.13  | 28.96  | 11.12  | 25.79  | 28.47  |
| NFKB2     | 13.03             | 17.85     | 18.36     | 6.42   | 14.28  | 47.22  | 4.15   | 10.58  | 15.45  |
| CXCL8     | 93.43             | 53.42     | 30.57     | 40.08  | 665    | 15.41  | 87.19  | 44.44  | 21.43  |
| IL1B      | 85.82             | 55.8      | 70        | 4.92   | 60.03  | 0.98   | 4.86   | 3.45   | 15.24  |
| IL6       | 2.34              | 5.18      | 3.48      | 5.69   | 14.34  | 22.4   | 16.03  | 6.67   | 12.39  |
| IFNGR1    | 124.86            | 152.35    | 166.72    | 49.29  | 157.79 | 68.13  | 61.25  | 114.17 | 121.57 |
| IFNGR2    | 141.04            | 168.79    | 200.74    | 98.05  | 113.48 | 205.37 | 77.54  | 54.45  | 190.82 |
| IFNAR2    | 14.09             | 22.98     | 20.82     | 7.76   | 26.34  | 8.35   | 7.52   | 11.98  | 16.93  |
| IFNAR1    | 26.69             | 33.77     | 34.23     | 14.09  | 29.39  | 29.99  | 12.63  | 17.96  | 32.96  |
| TNFRSF4   | 4.72              | 4.05      | 10.42     | 2.14   | 7.98   | 0      | 5.1    | 5.42   | 5.79   |
| TNFRSF14  | 13.04             | 11.26     | 17.46     | 4.76   | 10.05  | 2.69   | 10.73  | 7.98   | 16.69  |
| TNFRSF1B  | 54.03             | 90.41     | 69.25     | 21.9   | 64.87  | 0.52   | 31.26  | 69.05  | 61.91  |
| TNFRSF11A | 2.65              | 3.09      | 1.15      | 3.98   | 2.9    | 0.1    | 2.89   | 2.88   | 1.01   |
| TNFRSF6B  | 5.54              | 5.05      | 4.01      | 1.69   | 3.81   | 4.28   | 3.22   | 1.14   | 4.59   |

Table S4. CyTOF Panel

| Metal | Target       | Clone     | Vendor       |
|-------|--------------|-----------|--------------|
| 89Y   | CD45         | HI30      | Fluidigm     |
| 113In | CD88         | P12/1     | BioRad       |
| 115In | CD44         | IM7       | BioLegend    |
| 141Pr | CD66b        | G10F5     | BioLegend    |
| 142Nd | CD19         | HIB19     | BioLegend    |
| 143Nd | HLA-DR       | L243      | Fluidigm     |
| 144Nd | CD69         | FN50      | Fluidigm     |
| 145Nd | cRTH2        | BM16      | BioLegend    |
| 146Nd | CD8a         | RPA.T8    | BioLegend    |
| 147Sm | CD10         | HI10a     | BioLegend    |
| 148Nd | CD28         | CD28.2    | BioLegend    |
| 149Sm | CD25         | 2A3       | Fluidigm     |
| 150Nd | CD38         | HIT2      | BioLegend    |
| 151Eu | CD123        | TUGH4     | BioLegend    |
| 152Sm | CD14         | M5E2      | BioLegend    |
| 153Eu | CD45RA       | HI100     | BioLegend    |
| 154Sm | CD163        | GHI/61    | Fluidigm     |
| 155Gd | CD27         | L128      | Fluidigm     |
| 156Gd | CCR4         | SID8BEE   | eBiosciences |
| 158Gd | CD3          | UCHT1     | BioLegend    |
| 159Tb | CD11c        | Bu15      | BioLegend    |
| 160Gd | IgG          | MHK49     | Fluidigm     |
| 161Dy | CD16         | 3G8       | BioLegend    |
| 162Dy | CD56         | NCAM16.2  | BioLegend    |
| 163Dy | CXCR3        | G025H7    | Fluidigm     |
| 164Dy | CD161        | HP-3G10   | BioLegend    |
| 165Ho | LAG3         | 11C3C65   | Fluidigm     |
| 166Er | HLA-G        | 87G       | BioLegend    |
| 167Er | Lox1         | 331212    | R&D Systems  |
| 168Er | CD127        | A019D5    | Fluidigm     |
| 169Tm | CD11b        | M170      | BioLegend    |
| 170Er | CCR7         | G043H7    | BioLegend    |
| 171Yb | CD68         | Y1/82A    | Fluidigm     |
| 172Yb | CD274(PD-L1) | 29E.2A3   | BioLegend    |
| 173Yb | CD335        | 9E2       | BioLegend    |
| 174Yb | CD4          | SK3       | Fluidigm     |
| 175Lu | PD-1         | EH12.2H7  | Fluidigm     |
| 176Yb | IL-10        | JES3-19F1 | BioLegend    |
| 209Bi | CXCR5        | MUSUBEE   | eBiosciences |

Table S5. Files Omitted from CyTOF Analyses

Table S5: Files Omitted from CyTOF Analyses

| Sample Name  | Figures Excluded |
|--------------|------------------|
| 1102 Decidua | 1,2,4,5          |
| 1165 CP      | 1,2,4,5          |
| PO38 PV      | 1,2,4            |
| 1094 CP      | 2,4              |
| 1130 CP      | 2,4              |
| 1131 CP      | 2,4              |

Table S6. Cell Type Identification

Table S6: Cell Type Identification

| Cell Type                    | Markers                                  |
|------------------------------|------------------------------------------|
| Leukocytes/Immune Cells      | CD45+                                    |
| T Cells                      | CD45+CD3+                                |
| B Cells                      | CD45+CD3-CD19+                           |
| Innate Cells                 | CD45+CD3-CD19-                           |
| CD4 T cells                  | CD45+CD3+ CD4+                           |
| CD8 T cells                  | CD45+CD3+ CD8+                           |
| Double Positive T Cells      | CD45+CD3+ CD4+ CD8+                      |
| Double Negative T Cells      | CD45+CD3+ CD4- CD8-                      |
| Regulatory T cells           | CD45+CD3+ CD4+ CD127 <sup>lo</sup> CD25+ |
| Macrophages                  | CD45+CD3-CD14+                           |
| NK Cells                     | CD45+CD3-CD19-CD14-CD56+                 |
| Dendritic Cells              | CD45+CD3-CD19-CD14-CD56- HLA-DR+         |
| Plasmacytoid Dendritic Cells | CD45+CD3-CD19-CD14-CD56- HLA-DR+ CD11b+  |
| Myeloid Dendritic Cells      | CD45+CD3-CD19-CD14-CD56- HLA-DR+ CD123+  |
| Innate Lymphoid Cells        | CD45+CD3-CD19- CD127+                    |
| Innate Lymphoid Cells Type 2 | CD45+CD3-CD19- CD127+ cRTH2+             |
| Dual Expressing Lymphocytes  | CD45+CD3+ CD19+                          |

Table S7. Differentially Expressed Chemokines

Table S7: Differentially Expressed Chemokines

| Gene Name | Expression Values |           |           |       |       |        |       |       |       |  |  |
|-----------|-------------------|-----------|-----------|-------|-------|--------|-------|-------|-------|--|--|
|           | Decidua 1         | Decidua 2 | Decidua 3 | CP1   | CP2   | CP3    | PV1   | PV2   | PV3   |  |  |
| CCL20     | 1.8               | 1.82      | 1.54      | 1.86  | 19.35 | 17.19  | 1.92  | 0.6   | 0.82  |  |  |
| CXCL1     | 13.87             | 30.47     | 10.96     | 10.19 | 63.07 | 200.51 | 10.3  | 54.14 | 6.71  |  |  |
| CXCL2     | 15.56             | 2.21      | 29.92     | 11.11 | 19.91 | 291.33 | 11.76 | 2.57  | 5.55  |  |  |
| CXCL9     | 8.14              | 6.96      | 6.01      | 2.43  | 0.11  | 0      | 0     | 0.05  | 0.4   |  |  |
| CXCL10    | 61.44             | 37        | 50.4      | 17.1  | 4.66  | 0.45   | 4.13  | 1.44  | 18.45 |  |  |
| CXCL11    | 3.71              | 2.37      | 2.43      | 0.37  | 0.31  | 0      | 0.25  | 0.32  | 2.03  |  |  |
| CXCL13    | 57.5              | 5.58      | 7.54      | 0.08  | 0     | 0      | 0     | 0     | 2.3   |  |  |
| CCR6      | 0.08              | 0.53      | 0.26      | 0.03  | 0     | 0.04   | 0     | 0     | 0.02  |  |  |
| CCL19     | 0.67              | 0.65      | 1.41      | 0     | 0     | 0      | 0     | 0     | 0.19  |  |  |
| CCL21     | 147.98            | 121.42    | 54.91     | 3.61  | 58.4  | 0.1    | 0.62  | 0.07  | 0.4   |  |  |
| CXCL12    | 17.24             | 6.77      | 14.59     | 4.01  | 1.36  | 0.01   | 3.03  | 1.18  | 4     |  |  |
| CCL17     | 2.51              | 3.02      | 0.67      | 0     | 0     | 0      | 0     | 0     | 0.12  |  |  |
| CCL8      | 176.57            | 38.1      | 73.7      | 40.76 | 13.42 | 1.98   | 3.02  | 2.41  | 22.94 |  |  |
| CCL5      | 28.58             | 34.01     | 143.58    | 11.25 | 16.63 | 0.12   | 4.67  | 5.99  | 27.3  |  |  |
| CCL14     | 14.33             | 1.65      | 6.49      | 0.15  | 0.18  | 0      | 0     | 0.04  | 0.4   |  |  |
| CCL14-15  | 0.17              | 0.41      | 5.36      | 0.91  | 1.52  | 0      | 0     | 0     | 0     |  |  |
| CCL23     | 13.59             | 4.29      | 19.25     | 0     | 0.4   | 0      | 0.26  | 1.1   | 2.08  |  |  |
| CCL4      | 173.82            | 72.43     | 292.49    | 51.6  | 61.12 | 3.65   | 28.47 | 17.57 | 77.83 |  |  |
| CXCR3     | 4.35              | 8.74      | 10.61     | 0.06  | 0.11  | 0      | 0     | 0.14  | 1.68  |  |  |

Table S8. IMC Panel

| Metal | Target     | Clone      | Vendor         |
|-------|------------|------------|----------------|
| 115In | CD44       | IM7        | BioLegend      |
| 142Nd | CD19       | 6OMP31     | Fluidigm       |
| 143Nd | Vimentin   | D21H3      | Fluidigm       |
| 144Nd | CD14       | EPR3653    | Fluidigm       |
| 147Sm | CD163      | EDHu-1     | Fluidigm       |
| 148Nd | PanKeratin | C11        | Fluidigm       |
| 151Eu | CD31       | EPR3094    | Fluidigm       |
| 152Sm | CD45       | D8M81      | Fluidigm       |
| 156Gd | CD4        | EPR6855    | Fluidigm       |
| 160Gd | IgG        | MHK49      | Fluidigm       |
| 161Dy | Ki67       | 8D5        | BioLegend      |
| 162Dy | CD8a       | C8/144B    | Fluidigm       |
| 164Dy | pZAP70     |            | Cell Signaling |
| 165Ho | pCREB      | 87G3       | Cell Signaling |
| 166Er | CD45RA     | HI100      | Fluidigm       |
| 167Er | p44/42     | D13.14.4E  | Cell Signaling |
| 169Tm | pSTAT3     | A1600213   | Cell Signaling |
| 170Er | CD3        | polyclonal | Fluidigm       |
| 171Yb | CD66a      | CD66a-B1.1 | Fluidigm       |
| 173Yb | CD45RO     | UCHL1      | Fluidigm       |
| 174Yb | HLA-DR     | LN3        | Fluidigm       |
| 175Lu | pS6        | D57.2.2E   | Cell Signaling |
| 176Yb | pHistoneH3 | HTA28      | Fluidigm       |

Table S9. Flow Cytometry Antibodies

| Fluorophore | Target | Clone | Vendor    |
|-------------|--------|-------|-----------|
| PE-Cy7      | CD3    | SK7   | Biolegend |
| PE          | CD69   | FN50  | Biolegend |
| PacBlue     | TNFa   | Mab11 | Biolegend |
| AF647       | IFNg   | 4S.B3 | Biolegend |
| Ki67        | AF488  |       | Biolegend |
| AF700       | CD45   | HI30  | Biolegend |
